# Supplementary material for: A Novel Strategy to Identify Endolysins with Lytic Activity against Methicillin-Resistant Staphylococcus aureus
Source: MDPI journal article supplement (doi:10.3390/ijms24065772), 2023-03-17
Supplement: s1 [file s1]

NADGWYGF  
 CHAP Putative\_endosynin 117  
 CHAP Putative\_endosynin 118  
 CHAP Putative\_endosynin 119  
 CHAP Putative\_endosynin 120  
 CHAP Putative\_endosynin 121  
 CHAP Putative\_endosynin 122  
 CHAP Putative\_endosynin 123  
 CHAP Putative\_endosynin 124  
 CHAP Putative\_endosynin 125  
 CHAP Putative\_endosynin 126  
 CHAP Putative\_endosynin 127  
 CHAP Putative\_endosynin 128  
 CHAP Putative\_endosynin 129  
 CHAP Putative\_endosynin 130  
 CHAP Putative\_endosynin 131  
 CHAP Putative\_endosynin 132  
 CHAP Putative\_endosynin 133  
 CHAP Putative\_endosynin 134  
 CHAP Putative\_endosynin 135  
 CHAP Putative\_endosynin 136  
 CHAP Putative\_endosynin 137  
 CHAP Putative\_endosynin 138  
 CHAP Putative\_endosynin 139  
 CHAP Putative\_endosynin 140  
 CHAP Putative\_endosynin 141  
 CHAP Putative\_endosynin 142  
 CHAP Putative\_endosynin 143  
 CHAP Putative\_endosynin 144  
 CHAP Putative\_endosynin 145  
 CHAP Putative\_endosynin 146  
 CHAP Putative\_endosynin 147  
 CHAP Putative\_endosynin 148  
 CHAP Putative\_endosynin 149  
 CHAP Putative\_endosynin 150  
 CHAP Putative\_endosynin 151  
 CHAP Putative\_endosynin 152  
 CHAP Putative\_endosynin 153  
 CHAP Putative\_endosynin 154  
 CHAP Putative\_endosynin 155  
 CHAP Putative\_endosynin 156  
 CHAP Putative\_endosynin 157  
 CHAP Putative\_endosynin 158  
 CHAP Putative\_endosynin 159  
 CHAP Putative\_endosynin 160  
 CHAP Putative\_endosynin 161  
 CHAP Putative\_endosynin 162  
 CHAP Putative\_endosynin 163  
 CHAP Putative\_endosynin 164  
 CHAP Putative\_endosynin 165  
 CHAP Putative\_endosynin 166  
 CHAP Putative\_endosynin 167  
 CHAP Putative\_endosynin 168  
 CHAP Putative\_endosynin 169  
 CHAP Putative\_endosynin 170  
 CHAP Putative\_endosynin 171  
 CHAP Putative\_endosynin 172  
 CHAP Putative\_endosynin 173  
 CHAP Putative\_endosynin 174  
 CHAP Putative\_endosynin 175  
 CHAP Putative\_endosynin 176  
 CHAP Putative\_endosynin 177  
 CHAP Putative\_endosynin 178

Sequence logo and sequence alignment for the endoysin protein family. The sequence logo at the top shows the conservation of residues across the 100 amino acid positions. Below it, a sequence alignment of 72 putative endoysin sequences is shown, with residues color-coded to match the sequence logo. The sequences are numbered 1 to 72 on the left. The alignment shows high conservation across most positions, with some variations in the C-terminal region.

Figure S1. Multi-alignment of putative endolysins belonging to group 1 based on amino acids.

(a) Multi-alignment of the cysteine, histidine-dependent amidohydrolases/peptidases domain (Accession: pfam05257 and sequence identity: 83.5%). (b) Multi-alignment of the Ami\_2 domain (Accession: smart00644 and sequence identity: 82.4%). (c) Multi-alignment of the SH3\_5 domain (Accession: pfam08460 and sequence identity: 75.8%).



(a) Multi-alignment of Ami\_3 domain

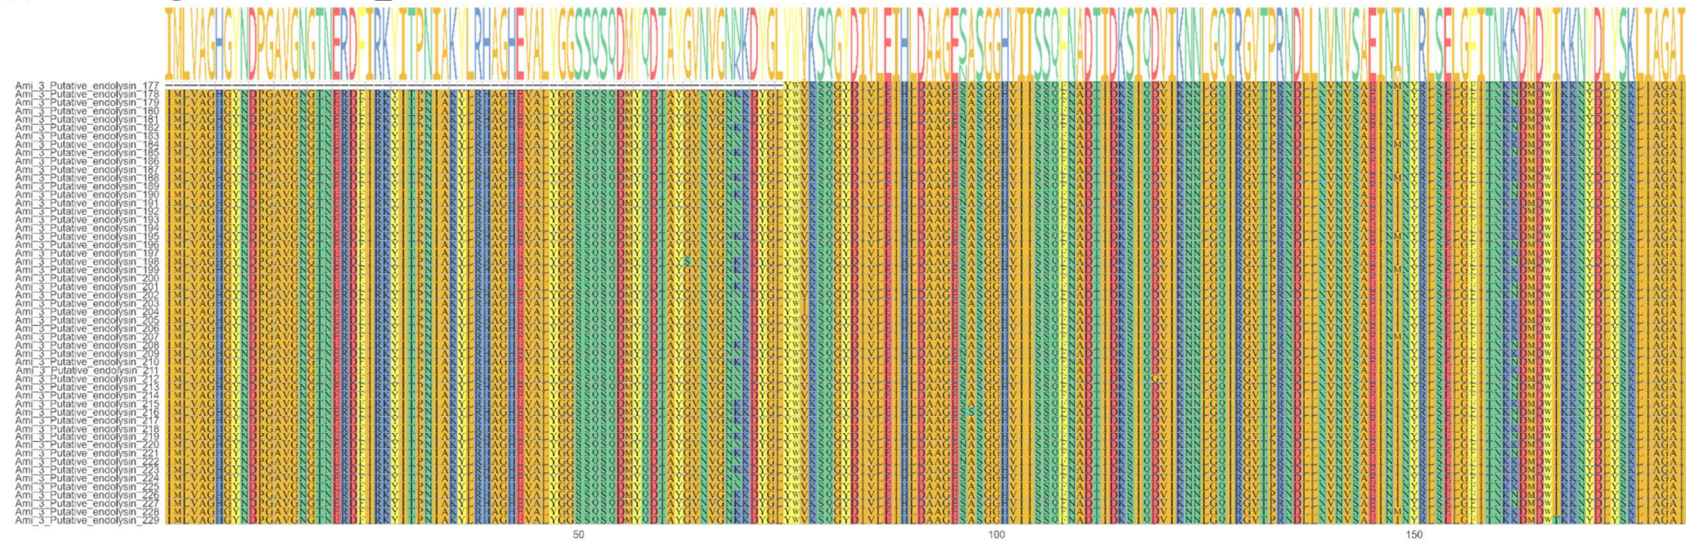

(b) Multi-alignment of SH3b domain

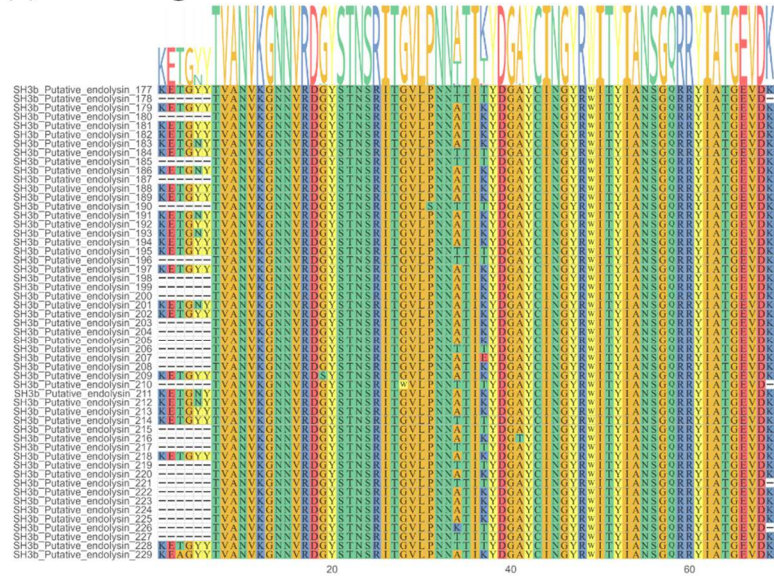

Figure S2. Multi-alignment of putative endolysins belonging to group 3 based on amino acids. (a) Multi-alignment of the Ami\_3 domain (Accession: pfam01520 and sequence identity: 95.1%). (b) Multi-alignment of the SH3\_b domain (Accession: smart00287 and sequence identity: 88.4%).



**(a) NCCP 16830**

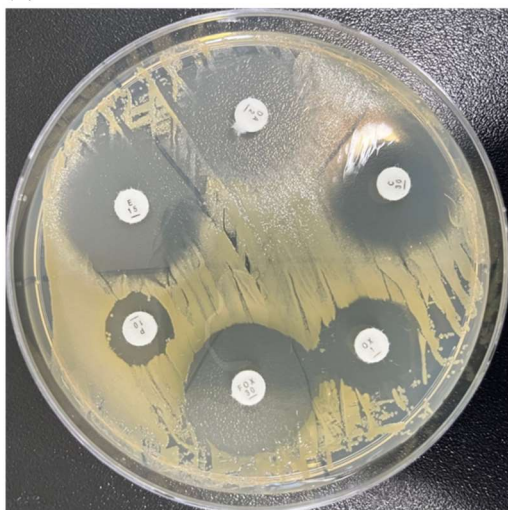

**(b) NCCP 14567**

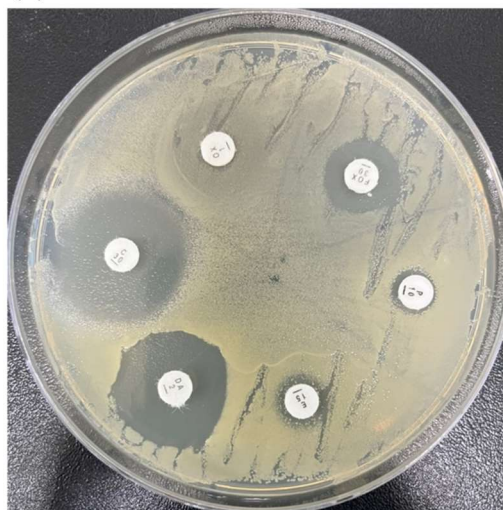

**(c) NCCP 14754**

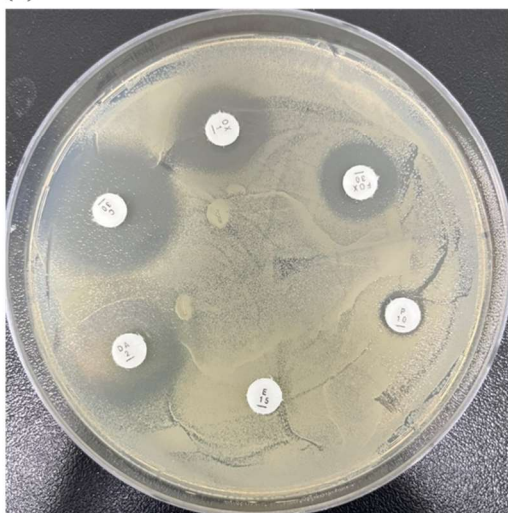

**(d) KVCC-BA0500624**

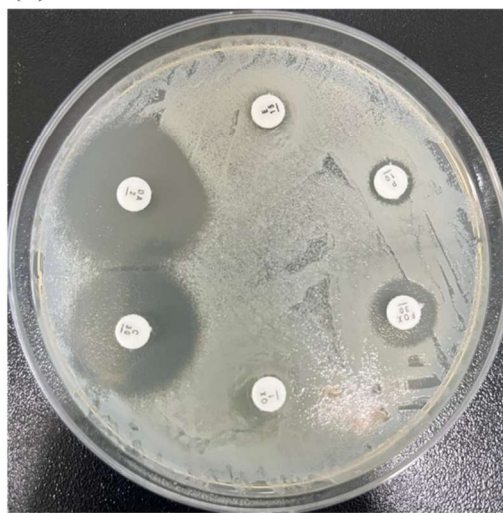

Figure S3. Antibiotic susceptibility test of *Staphylococcus aureus* strains. Cells of each *S. aureus* strain were spread on Mueller-Hinton agar, and antibiotic discs were placed on the plates. FOX, cefoxitin, 30  $\mu$ g; OX, oxacillin, 1  $\mu$ g; P, penicillin, 10  $\mu$ g; E, erythromycin, 15  $\mu$ g; DA, clindamycin, 2  $\mu$ g; Chloramphenicol, 30  $\mu$ g.
